# Supplementary material
Source: ML conference proceedings conference paper supplement (https://proceedings.neurips.cc/paper_files/paper/2023/hash/be82bb4bf8333107b0fe430e1017831a-Abstract.html)
Supplement: Supplementary file 1 [file be82bb4bf8333107b0fe430e1017831a-Supplemental-Conference.pdf]

# 1 Supplementary

Code and data to replicate our experiments can be found at <https://github.com/ppope/rho-learn>.

## 1.1 DFT Relaxations

We relax structures using Quantum Espresso (v6.7) and the AiiDA relaxation workflow [3]. The fast relaxation protocol without magnetization. For complete documentation of relaxation parameters see the Supplementary of [3]. Note for pseudo-potentials this protocol uses the `efficiency` set of the SSSP library 1.2.1 [4]. We use the PBE exchange-correlation functional for all relaxations.

## 1.2 Hyperparameters for model training

We document all hyperparameters used for training the SCN models in the accompanying file `hyperparams.yml`. This set was modified from the official SCN implementation in the OCP repo [1]. In particular a much smaller model was used than the state-of-the-art SCN results.

## 1.3 Initializing SCF runs in Quantum Espresso with learned densities

An SCF run may be initialized with a custom density, e.g. one generated from a machine-learning model, using the `startingpot` input parameter of Quantum Espresso (QE) [2]. Importantly, we use QE compiled with HDF5 support, rather than machine-dependent dat binary files. To initialize an SCF run with a learned density, we follow the file format of the HDF5 charge density files expected by QE. This format includes coefficients of the *reciprocal* charge densities and their associated Miller indices. Only data with associated reciprocal space vector  $G$  with  $|G|^2 \leq \text{ecutrho}$  is written, where `ecutrho` is the energy cutoff for charge density in suitable units. We validate our charge-density read/write implementation is correct by checking that convergence of ground-truth densities are unaffected by reading/writing.

## References

- [1] Open Catalyst Project - ocp repository. URL <https://github.com/Open-Catalyst-Project/ocp>.
- [2] Quantum Espresso - pw.x input description: `startingpot`. URL [https://www.quantum-espresso.org/Doc/INPUT\\_PW.html#idm899](https://www.quantum-espresso.org/Doc/INPUT_PW.html#idm899).
- [3] Sebastiaan P Huber, Emanuele Bosoni, Marnik Berx, Jens Bröder, Augustin Degomme, Vladimir Dikan, Kristjan Eimre, Espen Flage-Larsen, Alberto Garcia, Luigi Genovese, et al. Common workflows for computing material properties using different quantum engines. *npj Computational Materials*, 7(1):136, 2021.
- [4] Gianluca Prandini, Antimo Marrazzo, Ivano E Castelli, Nicolas Mounet, and Nicola Marzari. Precision and efficiency in solid-state pseudopotential calculations. *npj Computational Materials*, 4(1):72, 2018.
